# Supplementary material
Source: PubMed Central journal article supplement (PMC6504149)
Supplement: DS1_JVDI_10.1177_1040638717729395.pdf [file DS1_JVDI_10.1177_1040638717729395.pdf]

Xba I

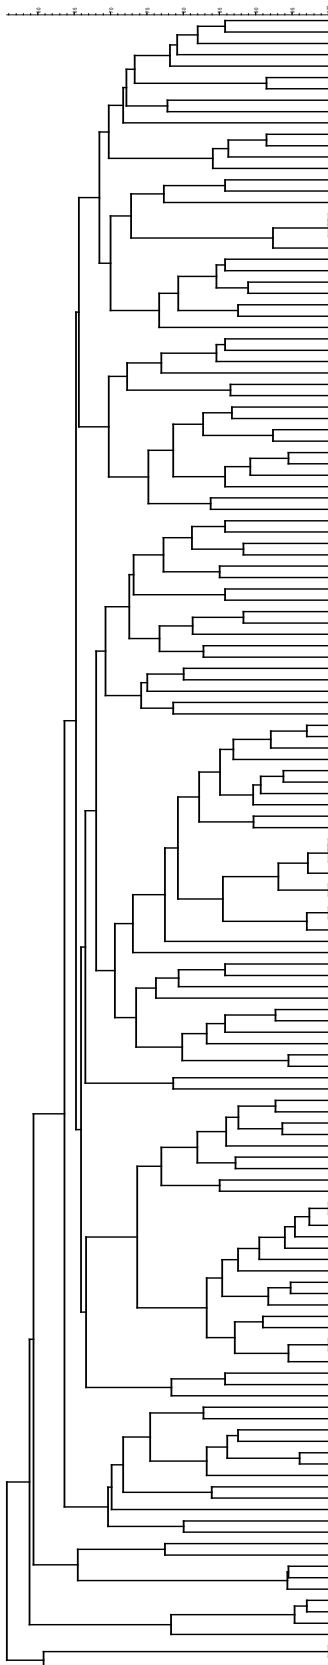

Xba I

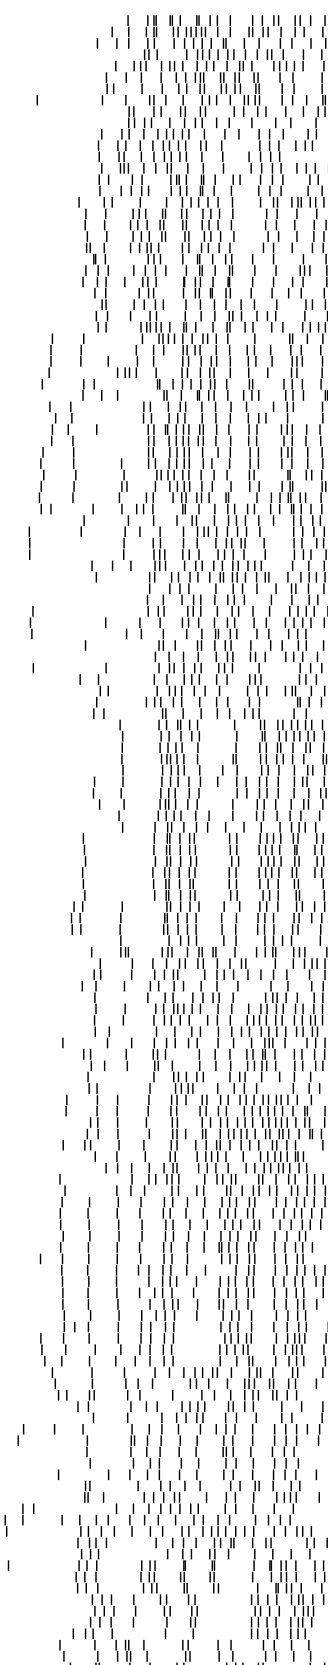

|          |        |               |                  |    |
|----------|--------|---------------|------------------|----|
| 5616-07  | CANINE | Cysto         | non-classifiable | B2 |
| 5736-07  | FELINE | Cysto         |                  |    |
| 5371-07  | CANINE | Cysto         |                  |    |
| 1924-07  | CANINE | Cysto         | UPEC             | B2 |
| 2423-05  | FELINE | Cysto         | ExPEC            | F  |
| 1303-07  | CANINE | Cysto         | UPEC             | B2 |
| 6269-07  | FELINE | Cysto         |                  |    |
| 3479-07  | CANINE | Cysto         |                  |    |
| 9144-07  | FELINE | Cysto         | non-classifiable | B2 |
| 1162-07  | CANINE | Cysto         | ExPEC            | B2 |
| 1450-07  | FELINE | Cysto         |                  |    |
| 782-05   | CANINE | Cysto         | ExPEC            | B2 |
| 2427-05  | CANINE | Cath Urine    |                  |    |
| 4057-05  | CANINE | Urine         | non-classifiable | B2 |
| 4614-07  | CANINE | Cysto         |                  |    |
| 5092-07  | CANINE | Cysto         |                  |    |
| 4121-04  | CANINE | Urine         | ExPEC            | B2 |
| 4096-07  | CANINE | Cysto         |                  |    |
| 4872-07  | CANINE | Urine         |                  |    |
| 5225-07  | CANINE | Cysto         | UPEC             | B2 |
| 1894-07  | CANINE | Cysto         |                  |    |
| 4860-07  | CANINE | Cysto         | non-classifiable | B2 |
| 5465-07  | CANINE | Cysto         |                  |    |
| 4086-07  | CANINE | Cysto         | non-classifiable | B2 |
| 5124-07  | CANINE | Cysto         |                  |    |
| 2906-05  | FELINE | Urine         | UPEC             | B2 |
| 5459-07  | CANINE | Cysto         |                  |    |
| 1498-07  | CANINE | Cysto         | non-classifiable | B2 |
| 1382-07  | FELINE | Urine         | UPEC             | B2 |
| 2085-07  | FELINE | Urine         |                  |    |
| 854-07   | FELINE | Cysto         | UPEC             | B2 |
| 1293-07  | CANINE | Cysto         |                  |    |
| 5113-07  | FELINE | Cath Urine    |                  |    |
| 6636-07  | FELINE | Urine         | UPEC             | B2 |
| 3952-07  | FELINE | R. peavis     |                  |    |
| 4062-07  | CANINE | Urine         | ExPEC            | B2 |
| 5138-07  | FELINE | Urine         |                  |    |
| 4945-07  | FELINE | Cysto         |                  |    |
| 1170-07  | FELINE | Cysto         | UPEC             | B2 |
| 1424-07  | FELINE | Cath Urine    |                  |    |
| 5539-07  | FELINE | Cysto         |                  |    |
| 2925-07  | CANINE | Cysto         | UPEC             | B2 |
| 1299-07  | CANINE | Urine         | UPEC             | B2 |
| 5617-07  | FELINE | Cysto         |                  |    |
| 6118-07  | CANINE | Cysto         |                  |    |
| 909-07   | CANINE | Prox wash     | UPEC             | B2 |
| 6150-07  | CANINE | Cysto         |                  |    |
| 976-07   | CANINE | Urine         |                  |    |
| 462-07   | FELINE | Cysto         |                  |    |
| 6224-07  | CANINE | Urine         | non-classifiable | B2 |
| 917-07   | CANINE | Urine         |                  |    |
| 942-07   | FELINE | Urine         |                  |    |
| 5475-07  | CANINE | Cysto         |                  |    |
| 5705-07  | CANINE | Cysto         | non-classifiable | B2 |
| 2450P-05 | FELINE | Urine         |                  |    |
| 1965-07  | FELINE | Cath Urine    | UPEC             | B2 |
| 5744-07  | FELINE | Cath Urine    |                  |    |
| 1786-07  | FELINE | Cath Urine    | UPEC             | B2 |
| 4074-07  | CANINE | Cath Urine    |                  |    |
| 4133-05  | FELINE | Free catch    | UPEC             | B2 |
| 415-05   | CANINE | Cath Tip      |                  |    |
| 786-07   | FELINE | Cath Tip      | UPEC             | B2 |
| 6340-07  | CANINE | Cysto         |                  |    |
| 6461-07  | CANINE | Cysto         | non-classifiable | C  |
| 2261-06  | FELINE | Cysto         |                  |    |
| 431-05   | CANINE | Cysto         | non-classifiable | C  |
| 2279-05  | CANINE | Blad wall     |                  |    |
| 6571-07  | CANINE | Cystocentesis |                  |    |
| 251-07   | CANINE | Cysto         |                  |    |
| 2807-05  | CANINE | Urine         | non-classifiable | D  |
| 4349-04  | CANINE | Cysto         |                  |    |
| 878-05   | FELINE | Urine         | UPEC             | B2 |
| 1713-05  | CANINE | Cysto         | ExPEC            | A  |
| 228-05   | CANINE | Cysto         |                  |    |
| 5303-04  | CANINE | Cath Urine    |                  |    |
| 2253-05  | CANINE | Cysto         |                  |    |
| 507-05   | CANINE | Urine         |                  |    |
| 728-05   | CANINE | Cysto         |                  |    |
| 5184-07  | FELINE | Cysto         |                  |    |
| 5775-07  | FELINE | Cysto         |                  |    |
| 3671-06  | CANINE | Cysto         | non-classifiable | A  |
| 4886-07  | CANINE | Cath Urine    |                  |    |
| 2906-07  | CANINE | Cysto         | MNEC             | B2 |
| 5695-05  | CANINE | Cysto         | non-classifiable | B1 |
| 784-07   | CANINE | Urine         |                  |    |
| 5374-04  | CANINE | Urine         | ExPEC            | B1 |
| 3481-07  | CANINE | Cath Urine    |                  |    |
| 462-07   | CANINE | Cysto         | UPEC             | B2 |
| 848-07   | CANINE | Urine         |                  |    |
| 6490-07  | CANINE | Cath Urine    |                  |    |
| 2492-07  | CANINE | Cysto         |                  |    |
| 1321-07  | CANINE | Cysto         | UPEC             | B2 |
| 1348-07  | CANINE | Cysto         |                  |    |
| 2850P-05 | FELINE | Urine         |                  |    |
| 6012-05  | FELINE | Cysto         | non-classifiable | B1 |
| 5265-04  | FELINE | Urine         |                  |    |
| 5828-05  | FELINE | Cysto         | ExPEC            | A  |
| 1170P-05 | CANINE | Cysto         | ExPEC            | F  |
| 1741-05  | FELINE | Urine         |                  |    |
| 1161-05  | CANINE | Cysto         |                  |    |
| 130P-05  | CANINE | Urine         |                  |    |
| 2695-05  | CANINE | Urine         | ExPEC            | D  |
| 3475-07  | CANINE | Free catch    | MNEC             | B2 |
| 6449-07  | CANINE | Cysto         |                  |    |
| 117-07   | CANINE | Cysto         |                  |    |
| 5824-04  | CANINE | Cath Urine    | ExPEC            | D  |
| 5605-04  | CANINE | Urine         |                  |    |
| 3448-05  | CANINE | Cysto         |                  |    |
| 5006-04  | CANINE | Cysto         |                  |    |
| 2305-06  | CANINE | Cysto         |                  |    |
| 4556-07  | CANINE | Cysto         | non-classifiable | D  |
| 1781-07  | CANINE | Cysto         |                  |    |
| 6407-07  | CANINE | Cysto         | non-classifiable | D  |
| 3807-07  | FELINE | Blad wall     |                  |    |
| 1395-05  | CANINE | Urine         | ExPEC            | D  |
| 2988-05  | FELINE | Cysto         |                  |    |
| 3424-05  | CANINE | Cysto         | ExPEC            | D  |
| Heather  | CANINE | Urine         |                  |    |
| 4542-07  | CANINE | Urine         |                  |    |
| 1027-07  | CANINE | Cysto         | ExPEC            | B2 |
| 254-07   | CANINE | Urine         |                  |    |
| 4312-07  | CANINE | Cysto         | non-classifiable | D  |
| 3887-07  | CANINE | Cath Urine    |                  |    |
| 3934-07  | FELINE | Cysto         |                  |    |
| 3832-07  | CANINE | Cysto         |                  |    |
| 6325-07  | CANINE | Cysto         |                  |    |
| 4270-04  | CANINE | Cysto         | ExPEC            | F  |
| 4936-06  | CANINE | Cath Urine    |                  |    |
| 3987-05  | CANINE | Cysto         |                  |    |
| 4250-07  | FELINE | Cysto         |                  |    |
| 6542-07  | CANINE | Cysto         | non-classifiable | D  |
| 2895-07  | CANINE | Blad Mucosa   | ExPEC            | D  |
| 340P-05  | CANINE | Urine         |                  |    |
| 5496-04  | CANINE | Urine         | ExPEC            | F  |
| 4344-07  | CANINE | Cysto         |                  |    |
| 4383-07  | CANINE | Cysto         |                  |    |
| 105-05   | CANINE | Cysto         |                  |    |
| 13-05    | CANINE | Urine         | ExPEC            | D  |
| 34-05    | CANINE | Cath Urine    |                  |    |
| 4927-05  | CANINE | Cath Urine    |                  |    |
| 815-05   | CANINE | Cath Urine    |                  |    |
| 4679-04  | CANINE | Urine         | ExPEC            | A  |
| 56-05    | CANINE | Cath Urine    | ExPEC            | A  |
| 2407-05  | CANINE | Cysto         | UPEC             | B2 |
| 3605-05  | CANINE | Cysto         |                  |    |
| 1551-07  | CANINE | Blad          |                  |    |
