# Supplementary material
Source: PubMed Central journal article supplement (PMC6504149)
Supplement: DS2_JVDI_10.1177_1040638717729395.pdf [file DS2_JVDI_10.1177_1040638717729395.pdf]

**Supplementary Table 1.** *E. coli* virulence gene association with clinical characteristics.

| Gene               | DM | HAC | Immun | CABx | PABx | PHosp | HxUTI | HxE.coli | Hosp | HAI |
|--------------------|----|-----|-------|------|------|-------|-------|----------|------|-----|
| <i>agn43</i>       |    |     |       |      | -    |       |       |          |      |     |
| <i>aidaI</i>       |    | +   |       |      |      |       |       |          |      |     |
| <i>b1432</i>       |    |     |       |      | -    |       |       |          | +    |     |
| <i>ccdB</i>        |    |     |       | +    |      |       |       |          |      |     |
| <i>cela</i>        |    |     | +     |      |      |       |       |          |      |     |
| <i>chuA</i>        |    |     |       |      | -    | -     |       | -        |      |     |
| <i>cib</i>         |    |     | +     |      | +    |       | +     | +        | -    |     |
| <i>cka</i>         | +  |     | +     |      |      |       |       |          |      |     |
| <i>cnfI</i>        |    |     |       |      | -    |       |       |          |      |     |
| <i>cotA</i>        |    |     |       |      |      | -     | -     |          |      |     |
| <i>cvaC</i>        |    | +   |       |      |      |       |       |          |      |     |
| <i>daaE</i>        |    | +   |       |      |      |       |       |          |      |     |
| <i>eivG</i>        |    |     |       | +    | +    |       |       |          |      |     |
| <i>eprJ</i>        |    |     |       | +    | +    | +     | +     |          | -    |     |
| <i>fepC</i>        |    |     |       |      | -    | -     |       | -        |      |     |
| <i>fimA</i>        |    |     | -     |      |      |       | -     | -        | +    |     |
| <i>fimH</i>        |    |     | -     |      |      |       | -     | -        | +    |     |
| <i>focA</i>        |    |     |       |      | -    | -     | -     |          |      |     |
| <i>focG</i>        |    |     |       | -    | -    |       |       |          |      |     |
| <i>fyuA</i>        |    |     |       |      | -    |       |       |          |      |     |
| <i>gad</i>         |    |     | +     | +    | +    |       |       |          |      |     |
| <i>hlyA</i>        |    |     |       |      | -    |       |       |          |      |     |
| <i>hraI</i>        |    |     | -     |      |      |       |       |          |      |     |
| <i>ibeB</i>        |    |     | -     |      |      |       |       |          |      |     |
| <i>iroN</i>        |    |     |       | -    |      | -     |       |          | +    |     |
| <i>irp1</i>        |    |     |       |      | -    |       |       |          |      |     |
| <i>irp2</i>        |    |     |       |      | -    |       |       |          |      |     |
| <i>iss</i>         |    |     |       |      | -    |       |       |          |      |     |
| <i>iucD</i>        |    |     | +     |      | +    |       |       |          |      |     |
| <i>iutA</i>        |    |     | +     |      | +    |       |       |          |      |     |
| <i>kpsM-III</i>    | +  | +   |       |      |      |       |       |          |      |     |
| <i>lpfA (EHEC)</i> |    |     |       |      | +    |       |       |          |      |     |
| <i>malX</i>        |    |     |       |      | -    |       |       |          |      |     |
| <i>mchB</i>        |    |     |       | -    | -    |       |       |          | +    |     |
| <i>mclC</i>        |    |     | +     |      |      |       |       |          |      |     |
| <i>ompT</i>        |    |     | -     | -*   | -*   | -     |       |          |      |     |
| <i>papA(12)</i>    |    |     |       |      |      | -     |       |          |      |     |
| <i>papC</i>        |    |     | -     |      | -    |       |       | -        | +    |     |
| <i>pixA</i>        |    |     |       |      |      |       |       |          |      | +   |
| <i>rfB(O101)</i>   |    |     |       |      |      |       | +     |          |      |     |
| <i>sfaA</i>        |    | +   |       |      |      |       |       |          |      |     |
| <i>sfaD</i>        |    |     |       | -    | -    |       |       |          | +    |     |

| Gene            | DM | HAC | Immun | CAbx | PAbx | PHosp | HxUTI | HxE.coli | Hosp | HAI |
|-----------------|----|-----|-------|------|------|-------|-------|----------|------|-----|
| <i>spaS</i>     |    |     |       | +    |      |       | +     |          |      |     |
| <i>tlrA</i>     |    |     |       |      |      |       |       |          |      | +*  |
| <i>tsh</i>      |    | +   |       |      |      |       |       |          |      |     |
| <i>tspE4.C2</i> |    |     |       | -    | -    |       |       |          |      |     |
| <i>usp</i>      |    |     | -     | -    | -    | -     |       |          |      |     |
| <i>vat</i>      |    |     |       | -    |      | -     |       |          |      |     |
| <i>virK</i>     |    |     |       |      |      |       |       | +        | -    |     |
| <i>wzx(O6)</i>  |    |     |       |      | -    |       |       |          |      |     |
| <i>yjaA</i>     |    |     |       | -    | -    |       |       |          |      |     |
| <i>z4184</i>    |    |     |       | +    | +    | +     | +     |          | -    |     |

+ = positively associated; - = negatively associated; CAbx = current antimicrobial therapy; DM = diabetes mellitus; HAC = hyperadrenocorticism; HAI = an infection that was suspected to have been acquired while in the hospital; Hosp = hospitalization for one or more days during the visit when the positive culture was collected; HxE.coli = previous history of at least one urinary tract infection known to be caused by *E. coli*; HxUTI = previous history of urinary tract infections; Immun = current immune-suppressing medication therapy; PAbx = antimicrobial therapy within the 3 mo prior to the positive culture; PHosp = hospitalization within the 3 mo prior to the positive culture.

\* Statistically significant after Bonferroni correction.
